# Supplementary material for: Sulforaphane protects microvascular endothelial cells in lower limb ischemia/reperfusion injury mice
Source: Royal Society of Chemistry journal article supplement (doi:10.1039/d3fo01801f), 2023-01-01

**Supplementary Information**

**for**

**Sulforaphane protects microvascular endothelial cells in lower limb**

**ischemia/reperfusion injury mice**

Fanfeng Chen *et. al*

**Figure S1**

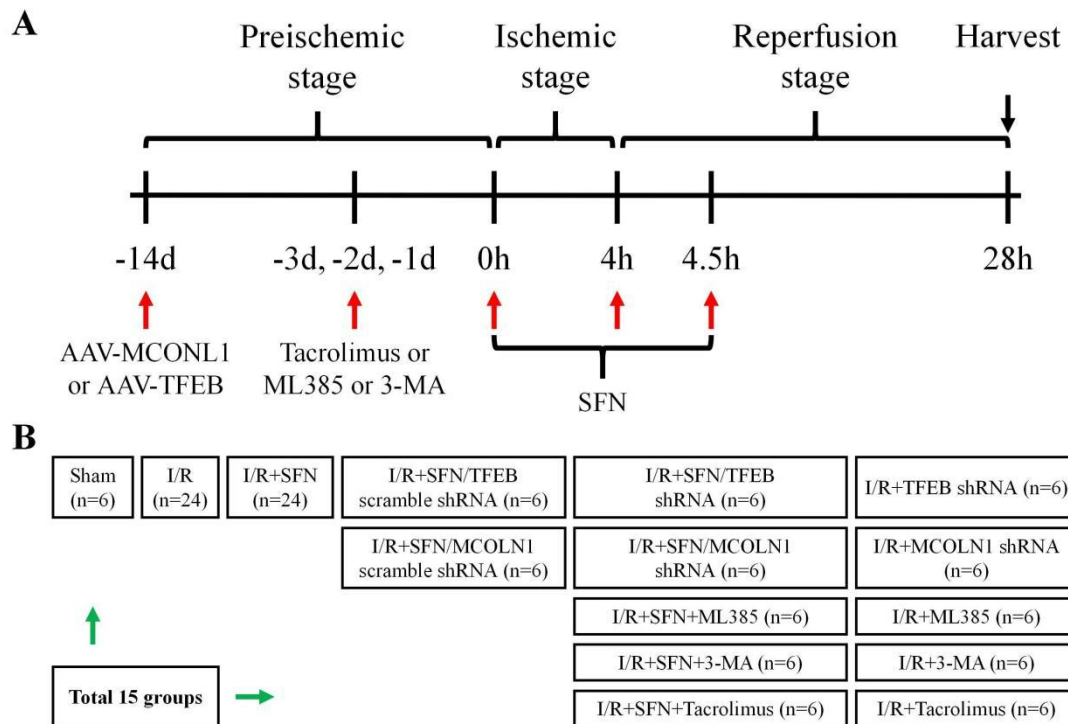

**Figure S1.** Study design and grouping strategy. **(A)** Schematic diagram of the steps of animal experiments. **(B)** Grouping strategy depending on the drug administration method. Abbreviations: SFN, sulforaphane; I/R, ischemia/reperfusion; TFEB, transcription factor EB; AAV, adeno-associated virus; 3MA, 3-methyladenine; MCOLN1, mucolipin 1.

**Figure S2**

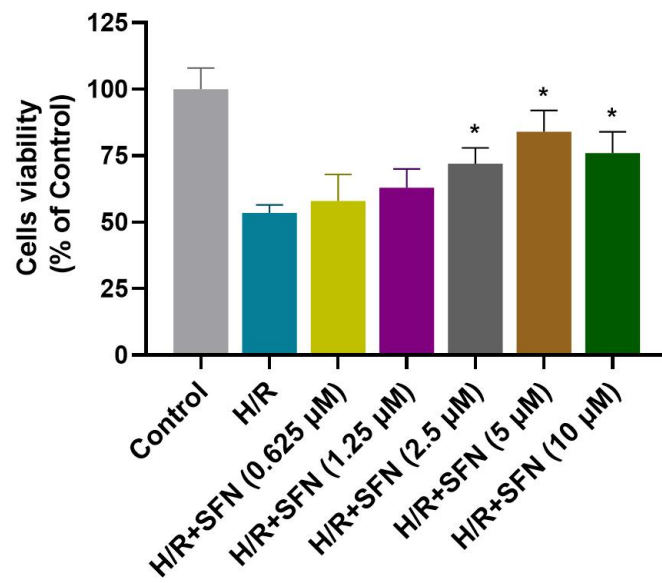

**Figure S2.** Effect of SFN on H/R-induced alterations in cell viability of HUVECs. Adopting CCK-8 to measure relative cell viability after being treated with SFN in different concentrations. Data are displayed as the means  $\pm$  SD (n = 4 per group). Significance: \* $P < 0.05$  vs. H/R group. Abbreviations: SFN, sulforaphane; H/R, hypoxia/reoxygenation; HUVECs, human umbilical vein endothelial cells; CCK-8, cell counting kit-8; SD, standard deviation.

**Figure S3**

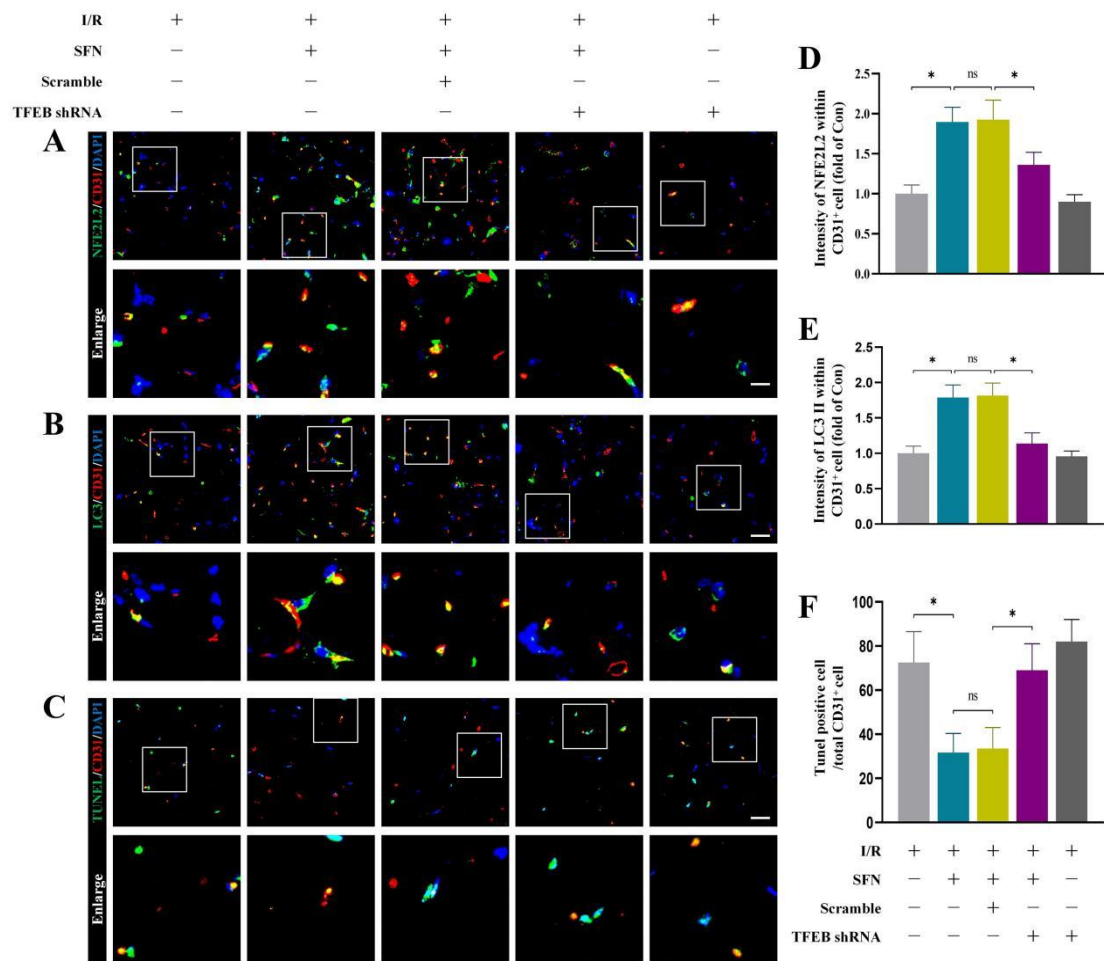

**Figure S3.** SFN enhances autophagy, attenuates oxidative stress and reduces EC death via enhancing TFEB activity in I/R limbs. Mice were treated with saline, SFN, SFN+scrambled shRNA, SFN+TFEB shRNA and TFEB shRNA, then underwent IR. (A-C) Images of skeletal muscle sections stained with antibodies against NFE2L2/CD31 (A, scale bars = 100  $\mu$ m), LC3/CD31 (B, scale bars = 50  $\mu$ m) and TUNEL/CD31 (C, scale bars = 100  $\mu$ m), merged images include DAPI staining. (D-E) Quantification of immunofluorescence data from (A-B) showing the mean optical density of NFE2L2 (A) and LC3 (B) on vascular endothelium (CD31<sup>+</sup> cell) in the skeletal muscle. (F) Quantification of TUNEL and CD31 double-positive cells, the percentages of double-positive cells versus total CD31 positive cells are indicated, data from (C). Data are expressed as the means  $\pm$  SD (n = 4 per group). Significance:

ns stands for not significant,  $*P < 0.05$ . Abbreviations: SFN, sulforaphane; I/R, ischemia/reperfusion; LC3, microtubule-associated protein 1 light chain 3; TFEB, transcription factor EB; shRNA, short hairpin RNA; NFE2L2, nuclear factor, erythroid 2 like 2; TUNEL, terminal deoxynucleotidyl transferase dUTP nick end labeling; CD31, cluster of differentiation 31; SD, standard deviation; DAPI, 4,6-diamidino-2-phenylindole.

**Figure S4**

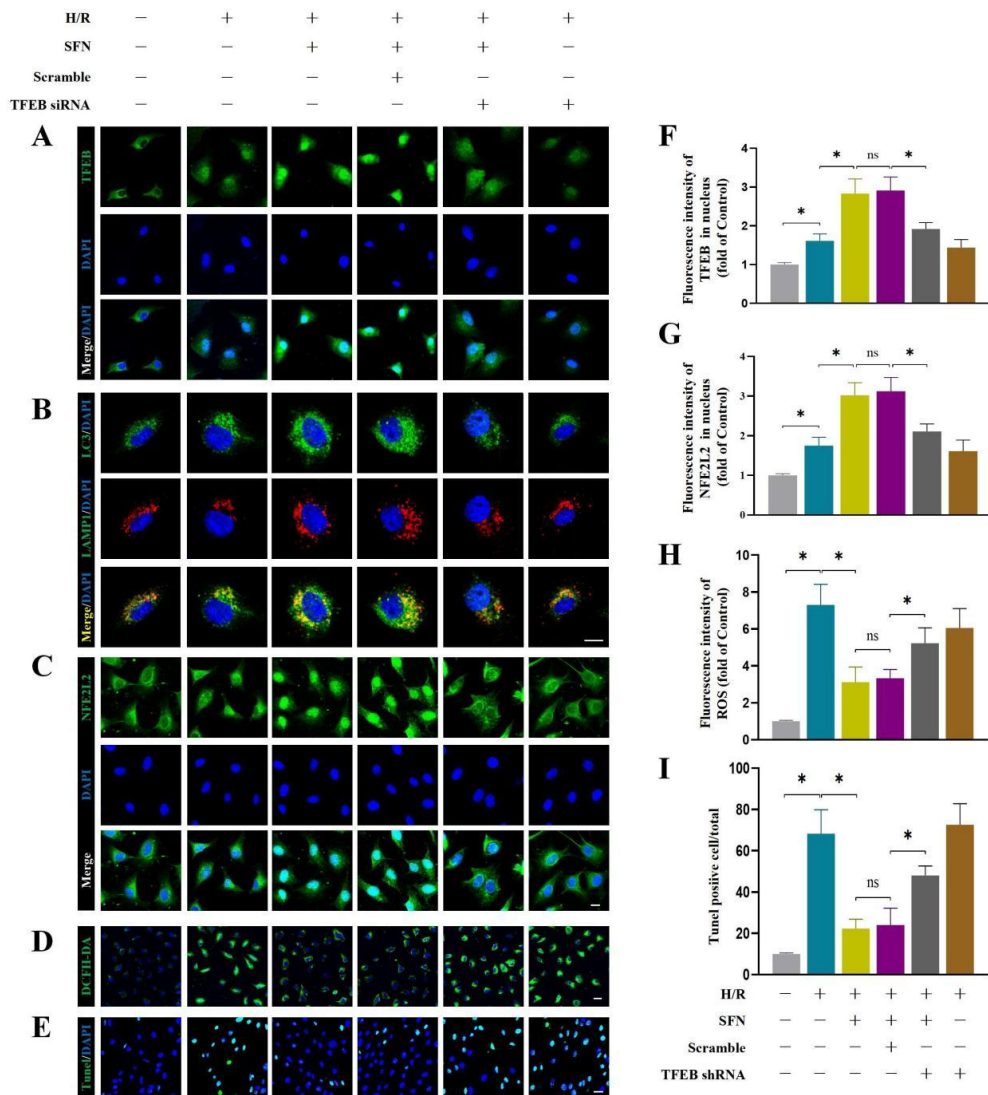

**Figure S4.** SFN enhances autophagy, attenuates oxidative stress and reduces EC death via enhancing TFEB activity in vitro. (A) Representative immunofluorescence images of HUVECs depicting TFEB and DAPI. Scale bars: 25  $\mu$ m. (B) Representative immunofluorescence images of HUVECs depicting LC3 and LAMP1, nuclei were recognized by DAPI staining. Scale bars: 10  $\mu$ m. (C) Representative immunofluorescence images of HUVECs depicting NFE2L2 and DAPI. Scale bars: 25  $\mu$ m. (D) ROS of HUVECs was detected by DCFH-DA assay, Scale bars: 25  $\mu$ m. (E) TUNEL assay of HUVECs, Scale bars: 25  $\mu$ m. (F) Quantification and analysis of immunofluorescence data from (A) displaying the average optical density of TFEB in the nucleus. (G) Quantification of immunofluorescence data from (C) displaying the average optical density of NFE2L2 in the nucleus. (H) Quantification and analysis of immunofluorescence data from (D) displaying the average optical density of ROS. (I)

The percentages of TUNEL-positive cells versus total cells are indicated from (E). Data are displayed as the means  $\pm$  SD (n = 4 per group). Significance: ns, non-significant;  $*P < 0.05$ . Abbreviations: SFN, sulforaphane; H/R, hypoxia/reoxygenation; HUVECs, human umbilical vein endothelial cells; DCFH-DA, 2'-7'-dichlorodihydrofluorescein-diacetate; ROS, reactive oxygen species; LAMP1, lysosomal associated membrane protein 1; CTSD, cathepsin D; LC3, microtubule-associated protein 1 light chain 3; TFEB, transcription factor EB; siRNA, short interfering RNA; NFE2L2, nuclear factor, erythroid 2 like 2; TUNEL, terminal deoxynucleotidyl transferase dUTP nick end labeling; CD31, cluster of differentiation 31; SD, standard deviation; DAPI, 4,6-diamidino-2-phenylindole.

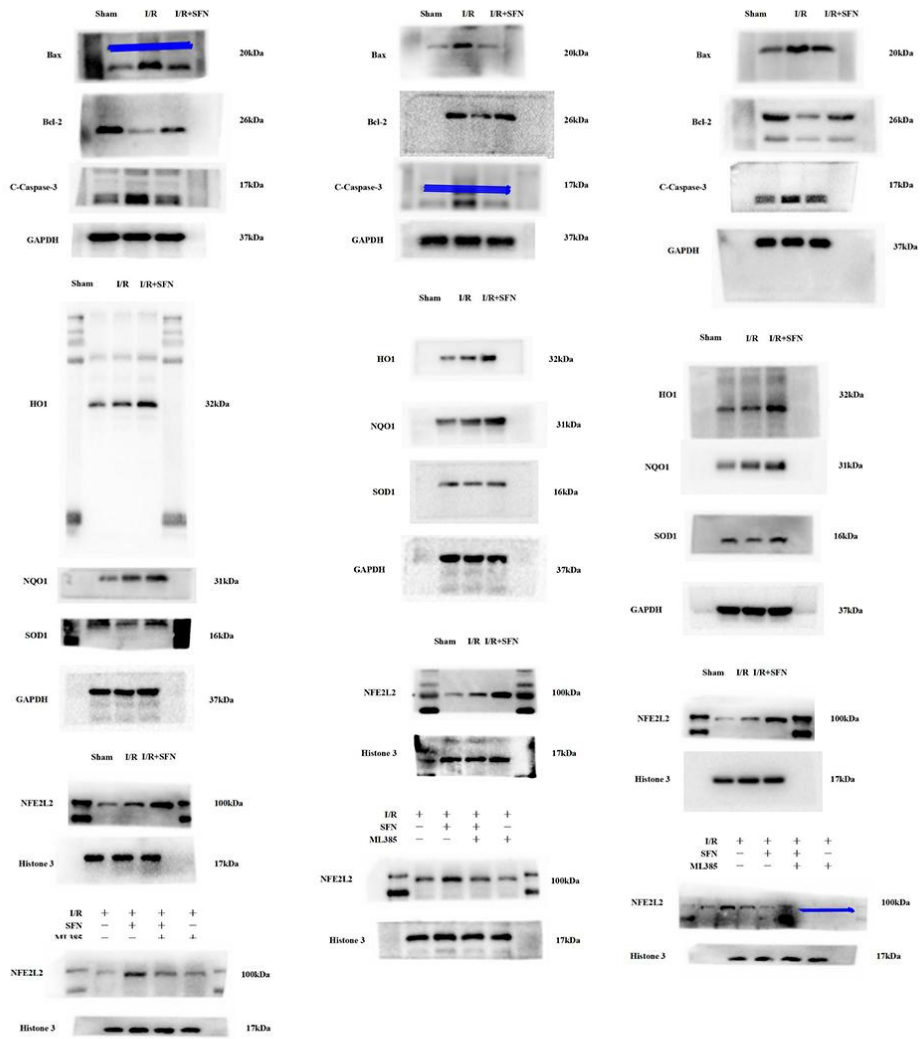



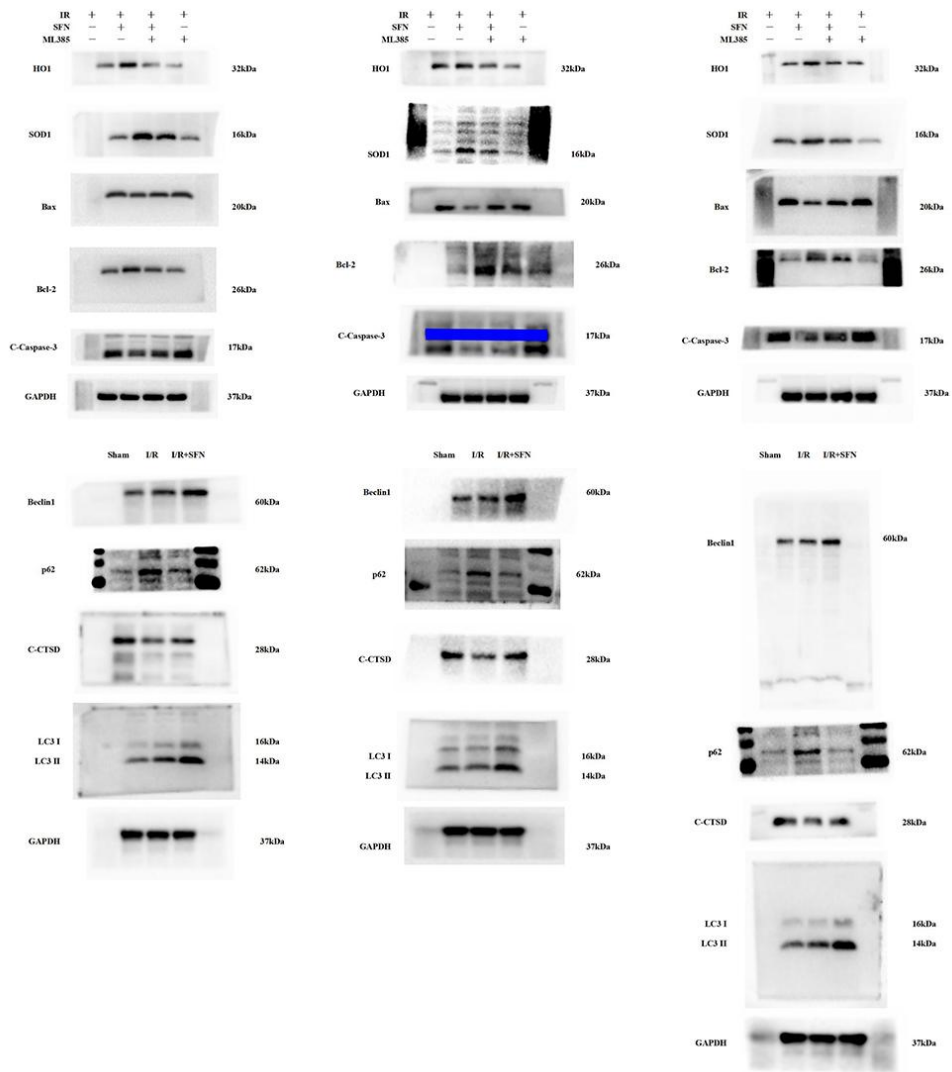

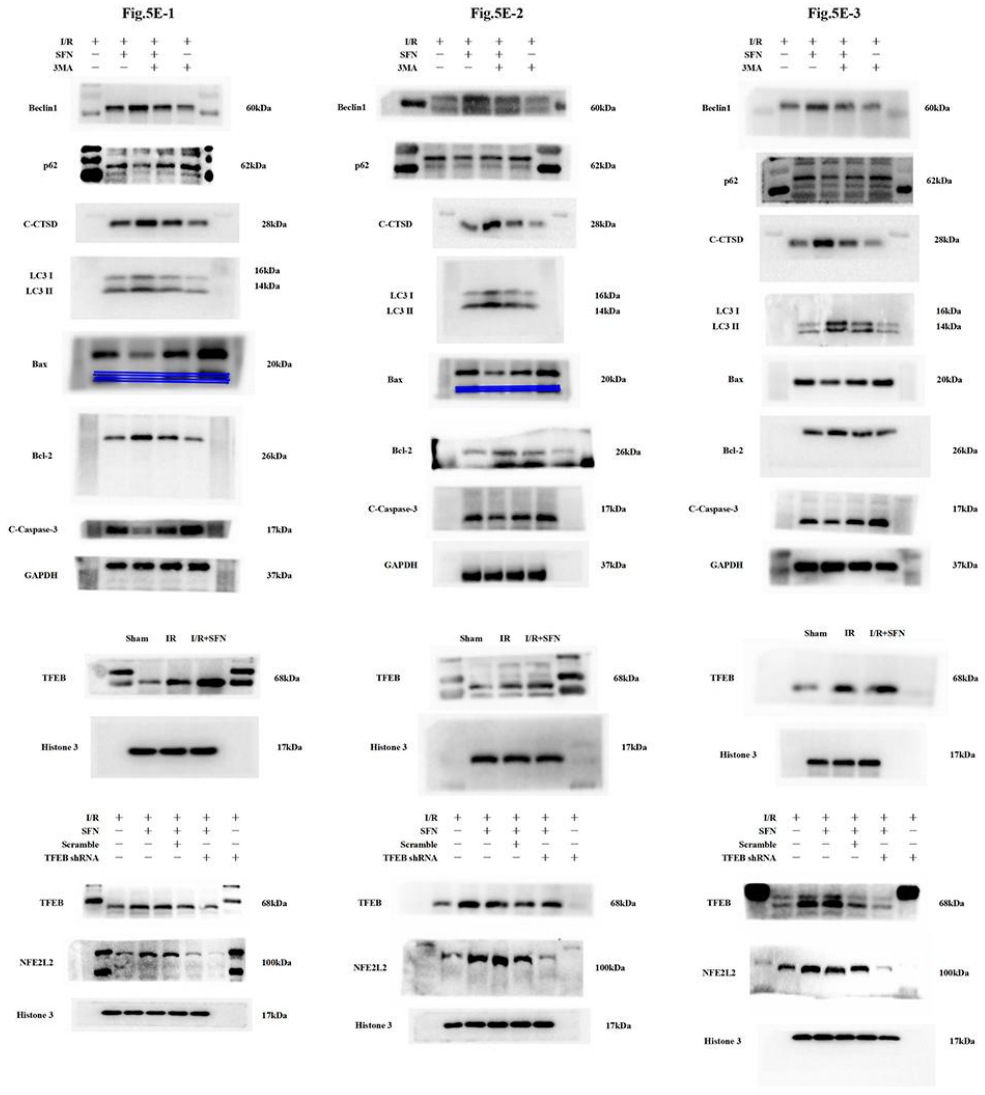

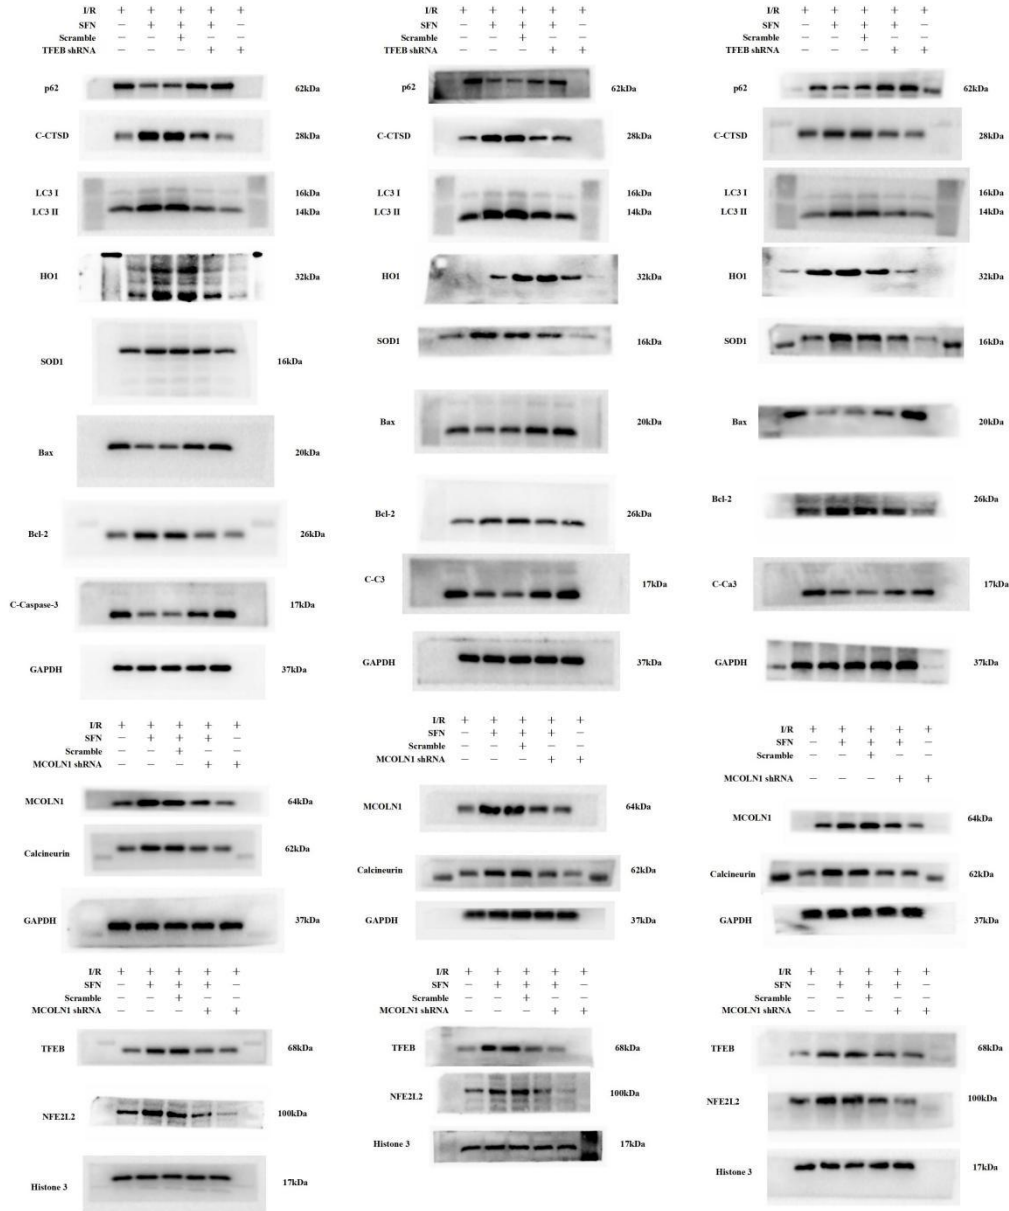

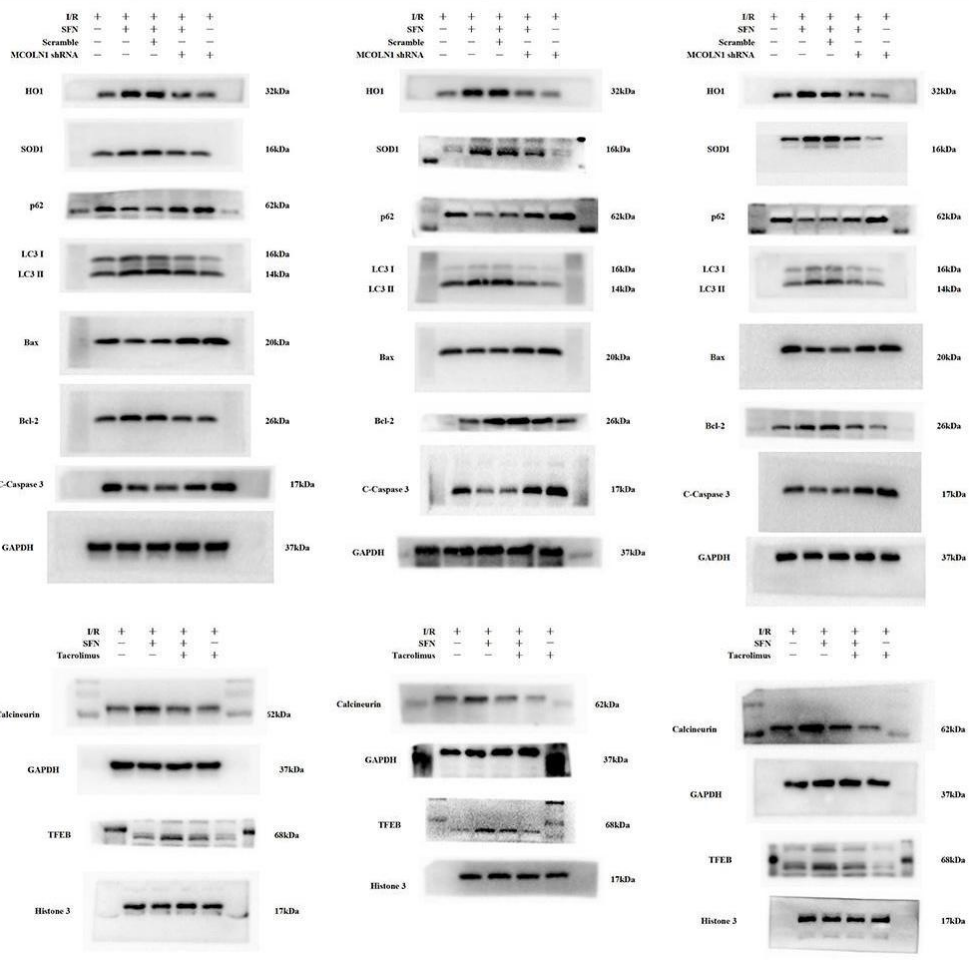

Supplement: d3fo01801f1.pdf [file d3fo01801f1.pdf]
